# PhyDOSE: Design of Follow-up Single-cell Sequencing Experiments of Tumors<sup>‡</sup>

Leah Weber<sup>1,\*</sup>    Nuraini Aguse<sup>1,\*</sup>    Nicholas Chia<sup>2,3</sup>    Mohammed El-Kebir<sup>1,†</sup>

<sup>1</sup>Dept. of Computer Science, University of Illinois at Urbana-Champaign, Urbana, IL 61801

<sup>2</sup>Microbiome Program, Center for Individualized Medicine, Mayo Clinic, Rochester, MN 55905

<sup>3</sup>Division of Surgical Research, Department of Surgery, Mayo Clinic, Rochester, MN 55905

\*Shared first authorship; †Corresponding author: melkebir@illinois.edu;

<sup>‡</sup>Accepted at RECOMB-CCB 2020

## Abstract

The combination of bulk and single-cell DNA sequencing data of the same tumor enables the inference of high-fidelity phylogenies that form the input to many important downstream analyses in cancer genomics. While many studies simultaneously perform bulk and single-cell sequencing, some studies have analyzed initial bulk data to identify which mutations to target in a follow-up single-cell sequencing experiment, thereby decreasing cost. Bulk data provide an additional untapped source of valuable information, composed of candidate phylogenies and associated clonal prevalences. Here, we introduce PhyDOSE, a method that uses this information to strategically optimize the design of follow-up single cell experiments. Underpinning our method is the observation that only a small number of clones uniquely distinguish one candidate tree from all other trees. We incorporate distinguishing features into a probabilistic model that infers the number of cells to sequence so as to confidently reconstruct the phylogeny of the tumor. We validate PhyDOSE using simulations and a retrospective analysis of a leukemia patient, concluding that PhyDOSE’s computed number of cells resolves tree ambiguity even in the presence of typical single-cell sequencing errors. In a prospective analysis, we demonstrate that only a small number of cells suffice to disambiguate the solution space of trees in a recent lung cancer cohort. In summary, PhyDOSE proposes cost-efficient single-cell sequencing experiments that yield high-fidelity phylogenies, which will improve downstream analyses aimed at deepening our understanding of cancer biology.

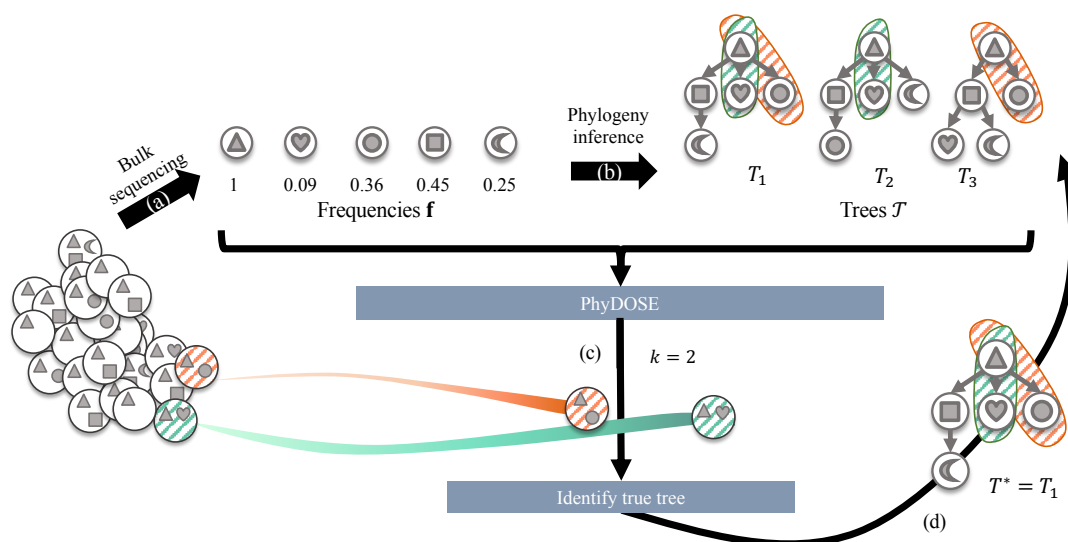

**Figure 1: PhyDOSE computes the number of single cells to sequence to identify the true phylogeny.** (a) Mutation frequencies  $\mathbf{f}$  obtained from bulk DNA sequencing data. (b) The solution space  $\mathcal{T}$  of trees inferred from  $\mathbf{f}$ . We show a distinguishing feature of  $T_1$  (orange and green). (c) For tree  $T_1$ , PhyDOSE suggests that  $k = 2$  single cells suffice to observe clones that are unique to  $T_1$ . (d) In a follow-up SCS experiment we observe  $k = 2$  cells, one from the orange clone and one from the green clone. As such, we eliminate trees  $T_2$  and  $T_3$ , concluding that phylogeny  $T_1$  is the true phylogeny  $T^*$ .

# 1 Introduction

Tumorigenesis follows an evolutionary process during which cells gain and accumulate somatic mutations that lead to cancer (Nowell, 1976). The most natural expression of an evolutionary process is a *phylogeny* — a tree that describes the order and branching points of events in the history of a cellular population. Tumor phylogenies are critical to understanding and ultimately treating cancer, with recent studies using tumor phylogenies to identify mutations that drive cancer progression (Jamal-Hanjani *et al.*, 2017; McGranahan *et al.*, 2015), assess the interplay between the immune system and the clonal architecture of a tumor (Łuksza *et al.*, 2017; Zhang *et al.*, 2018), and identify common evolutionary patterns in tumorigenesis and metastasis (Turajlic *et al.*, 2018a,b). These downstream analyses critically rely on accurate phylogenies that are inferred from sequencing data of a tumor.

The majority of current cancer genomics data consist of pairs of matched normal and tumor samples that have undergone bulk DNA sequencing. Bulk data is composed of sequences from cells with distinct genomes. More specifically, we observe frequencies  $\mathbf{f} = [f_i]$  for the set of somatic mutations in the tumor (Fig. 1a). Many deconvolution methods have been proposed for tumor phylogeny inference from such data (Deshwar *et al.*, 2015; El-Kebir *et al.*, 2015, 2016; Malikić *et al.*, 2015; Popić *et al.*, 2015; Yuan *et al.*, 2015), typically inferring a set  $\mathcal{T}$  of equally plausible trees (Fig. 1b). These approaches are unsatisfactory, as candidate trees with different topologies may alter conclusions in downstream analyses. Single-cell sequencing (SCS), as opposed to bulk sequencing, enables us to observe specific clones present within the tumor. These clones correspond to the leaves of the true phylogeny, allowing phylogeny inference methods to reconstruct the tree itself once we observe all clones in the tumor (El-Kebir, 2018; Jahn *et al.*, 2016; Ross and Markowitz, 2016; Zafar *et al.*, 2017). However, the elevated error rates of SCS, as well as its high cost (Navin, 2014), make it prohibitive as a standalone method for phylogeny inference. As such, hybrid methods have been recently proposed to infer high-fidelity phylogenies from combined bulk and SCS data obtained from the same tumor (Malikić *et al.*, 2019a,b).

Several hybrid datasets have been obtained by performing bulk and single-cell DNA sequencing simultaneously (Kuboki *et al.*, 2019; Leung *et al.*, 2017). However, there is merit in first performing bulk sequencing to guide follow-up SCS experiments. For instance, several studies first identified a subset of single-nucleotide variants from the bulk data to target in subsequent SCS experiments, thereby reducing costs compared to conventional whole-genome SCS approaches (Gawad *et al.*, 2014; Kim *et al.*, 2018; McPherson *et al.*, 2016). Davis *et al.* (2019) recently introduced SCOPIT, a method to compute how many cells are needed to observe all clones of a tumor, given estimates on the smallest prevalence of a clone as well as the number of clones to detect. The authors provide no guidance on how to obtain these two quantities. Here, we build upon this work by directly incorporating knowledge encoded by the trees  $\mathcal{T}$  inferred from the initial bulk sequencing data. Indeed, by using data from a SCS experiment we may eliminate trees from  $\mathcal{T}$  that do not align with the observed clones (Fig. 1). In other words, if we observe all clones in a tumor, it is possible to determine the phylogeny of the tumor. However, is it possible to achieve the same goal by observing fewer clones? If so, how many cells are necessary for us to observe the required clones?

We introduce Phylogenetic Design Of Single-cell sequencing Experiments (PhyDOSE), a method to strategically design a follow-up SCS experiment aimed at inferring the true phylogeny (Fig. 1). Given a set  $\mathcal{T}$  of candidate trees inferred from initial bulk data, we describe how to distinguish a single tree  $T$  among the rest using features unique to  $T$ . In particular, if our SCS experiment results in observing cells corresponding to a distinguishing feature of  $T$ , we may conclude that  $T$  is in fact the true tree. This means that we can typically identify  $T$  using only a subset of the clones. To determine the number of cells to sequence, we introduce a probabilistic model that incorporates SCS errors and models successful SCS experiments as a tail probability of a multinomial distribution (Fig. 1c). Finally, we reconcile the sampled cells utilizing these distinguishing features to infer the true phylogeny (Fig. 1d). We validate PhyDOSE using both simulated data and a retrospective analysis of a leukemia patient that has undergone both bulk and SCS sequencing. We also demonstrate the utility of PhyDOSE by prospectively computing how many cells are needed to resolve the uncertainty in phylogenies of a recent lung cancer cohort. The cost-efficient SCS experiments enabled by PhyDOSE will yield high-fidelity phylogenies, improving downstream analyses aimed at understanding tumorigenesis and developing treatment plans.

## 2 Problem Statement

Let  $n$  be the number of single-nucleotide variants, or simply *mutations*, identified from initial bulk sequencing data of a matched normal and tumor biopsy sample. For each mutation  $i$ , we observe the *variant allele frequency* (VAF), i.e. the fraction of aligned reads that harbor the tumor allele at the locus of mutation  $i$ . Specialized methods exist that combine copy number information and VAFs to infer a *cancer cell fraction*  $f_i$  for each mutation  $i$ , which is the proportion of cells in the tumor biopsy that contain at least one copy of the mutation (Bolli *et al.*, 2014; Dentro *et al.*, 2017; Jamal-Hanjani *et al.*, 2017; Stephens *et al.*, 2012). Here, we refer to cancer cell fractions as *frequencies*. Typically, phylogenies  $\mathcal{T}$  inferred by current methods from frequencies  $\mathbf{f} = [f_i]$  adhere to the infinite sites assumption. That is, each mutation  $i$  is introduced exactly once at vertex  $v_i$  and never subsequently lost.

When we sequence a single cell from the same tumor biopsy, assuming no errors, we identify a clone of the tumor. In other words, we observe a set of mutations that must form a connected path in the unknown true phylogeny  $T^*$ . By repeatedly sequencing single cells until we observe all clones in the tumor, we will have observed all root-to-vertex paths of  $T^*$ , thus identifying tree  $T^*$  itself. We assume that (i) the true unknown phylogeny  $T^*$  is among the trees in  $\mathcal{T}$  and that (ii) mutations among single cells that we sample from the tumor biopsy follow the same distribution as  $\mathbf{f}$ . The latter assumption particularly holds for liquid tumors with well-mixed tumor populations, and may be expected to hold for solid tumors if we isolate single cells at random from the same tissue that underwent bulk sequencing. This leads to the following question

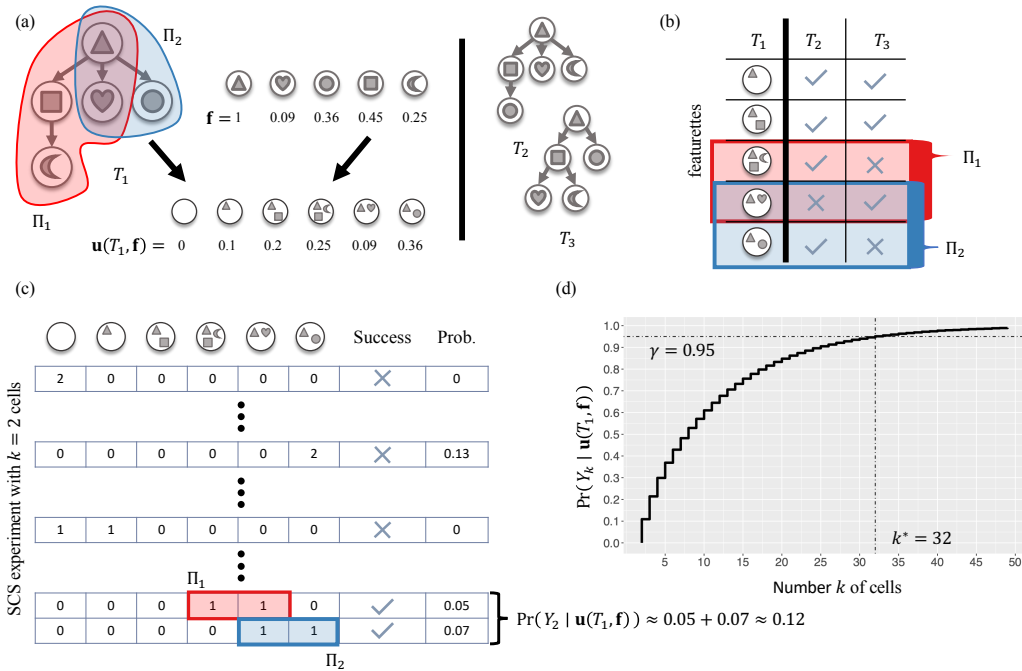

**Figure 2: The SCS POWER CALCULATION FOR PHYLOGENY  $T$  ( $T$ -SCS-PC) problem.** (a) We are given frequencies  $\mathbf{f}$  and a tree  $T_1$  that we want to distinguish from the other trees  $\{T_2, T_3\}$ . The pair  $(T_1, \mathbf{f})$  uniquely determine clonal prevalences  $\mathbf{u}(T_1, \mathbf{f})$ . (b) Featurettes of  $T_1$  correspond to root-to-vertex paths, yielding distinguishing features  $\Pi_1$  and  $\Pi_2$ , each with one featurette absent in  $T_2$  and another absent in  $T_3$ . (c) With  $k = 2$  cells, we must observe clones from either  $\Pi_1$  or  $\Pi_2$  for a successful outcome, resulting in probability  $\Pr(Y_2 | \mathbf{u}(T_1, \mathbf{f})) \approx 0.12$ . (d) To increase this probability to  $\gamma = 0.95$ , we need  $k^* = 32$  cells.

and problem statement. How many single cells do we need to identify  $T^*$  with confidence level  $\gamma$ ?

**Problem 1** (SCS POWER CALCULATION (SCS-PC)). Given a set  $\mathcal{T}$  of candidate phylogenies, frequencies  $\mathbf{f}$  and confidence level  $\gamma$ , find the minimum number  $k^*$  of single cells needed to determine the true phylogeny  $T^*$  among  $\mathcal{T}$  with probability at least  $\gamma$ .

Clearly, we do not know which phylogeny in  $\mathcal{T}$  is the true underlying phylogeny  $T^*$  of the tumor. Thus, we consider a slightly different problem: In the  $T$ -SCS-PC problem (defined formally at the end of the section), we are given an arbitrary phylogeny  $T \in \mathcal{T}$  and want to perform a similar power calculation when conditioning on  $T$  being the true phylogeny. By solving the  $T$ -SCS-PC problem for all trees  $T_1, \dots, T_{|\mathcal{T}|}$ , we obtain the numbers  $k(T_1), \dots, k(T_{|\mathcal{T}|})$  of single cells needed for each tree. As  $T^*$  is in  $\mathcal{T}$ , the maximum number among  $k(T_1), \dots, k(T_{|\mathcal{T}|})$  is an upper bound on the number of required SCS experiments to identify  $T^*$  with probability at least  $\gamma$ . To solve the  $T$ -SCS-PC problem, we need to reason for which SCS experiments we can conclude that  $T$  is the true phylogeny.

Observe that each tree  $T$  in  $\mathcal{T}$  describes a unique set of clones, corresponding to the sets of mutations encountered in all root-to-vertex paths of  $T$  (Fig. 1). Thus, if we observe all clones of a phylogeny  $T$  in our SCS experiments, we may conclude that  $T$  is the true phylogeny. What is the probability of doing so? To answer this question, we must compute the prevalence of each clone in the tumor biopsy. For phylogenies that adhere to the infinite sites assumption, the prevalences  $\mathbf{u}(T, \mathbf{f}) = [u_i]$  of the clones in the tumor biopsy are uniquely determined by the phylogeny  $T$  and frequencies  $\mathbf{f}$  as

$$u_i = f_i - \sum_{j \in \delta_T(i)} f_j \quad \forall i \in [n]. \quad (1)$$

where  $\delta_T(i)$  is the set of children of the node where mutation  $i$  was introduced (El-Kebir *et al.*, 2015).

Tumor phylogeny inference methods guarantee that the inferred phylogenies  $\mathcal{T}$  from frequencies  $\mathbf{f}$  have clonal prevalences  $\mathbf{u}(T, \mathbf{f}) = [u_i]$  that are nonnegative and that  $\sum_{i=1}^n u_i \leq 1$ , where the remainder  $u_0 = 1 - \sum_{i=1}^n u_i$  is the prevalence of the normal clone. Thus, conditioning on a phylogeny  $T$  and frequencies  $\mathbf{f}$ , sequencing one cell from the tumor will lead us to observe one of the  $n + 1$  clones of  $T$  with probabilities  $(u_0, \dots, u_n)$ . In other words, the outcome of this SCS experiment with one cell is a draw from the categorical distribution  $\text{Cat}(u_0, \dots, u_n)$ . The possible outcomes of a SCS experiment composed of  $k$  cells thus follow a multinomial distribution  $\text{Mult}(u_0, \dots, u_n)$ . Thus, the probability of observing all tumor clones of  $T$  in such a SCS experiment with  $k$  cells corresponds to the tail probability of the multinomial where each of the  $n$  tumor clones is observed at least once. The corresponding *power calculation* is to determine the smallest number for  $k$  where the tail probability is greater or equal to the confidence level  $\gamma$ . Note that this power calculation for observing all clones was previously introduced by Davis *et al.* (2019).

Importantly, in many cases we need not observe all clones of  $T$  to distinguish  $T$  from the remaining phylogenies  $\mathcal{T} \setminus \{T\}$  (Fig. 2). This means that we may conclude that  $T$  is the true phylogeny with a SCS experiment with fewer cells. To formalize this notion, we start by defining a featurette.

**Definition 1.** A *featurette*  $\tau$  is a subset of mutations.

We say that a featurette  $\tau$  is *present* in a phylogeny  $T$  if the nodes/mutations of  $\tau$  induce a path of  $T$  starting at the root node, otherwise we say that  $\tau$  is *absent* in  $T$ . The same featurette, however, may be present in more than one phylogeny. Thus, multiple featurettes may be required to distinguish a phylogeny  $T$  from the remaining phylogenies  $\mathcal{T} \setminus \{T\}$ .

**Definition 2.** A set  $\Pi$  of featurettes is a *distinguishing feature* of  $T$  if (i) for all featurettes  $\tau \in \Pi$  it holds that  $\tau$  is present in  $T$ , and (ii) for each remaining phylogeny  $T' \in \mathcal{T} \setminus \{T\}$  there exists a featurette  $\tau' \in \Pi$  where  $\tau'$  is absent in  $T'$ .

Thus, a SCS experiment where we observe one cell from each clone of a distinguishing feature  $\Pi$  of  $T$  enables us to conclude that phylogeny  $T$  is the true phylogeny. As discussed, every phylogeny  $T$  has a *trivial distinguishing feature*, which is composed of all featurettes present in  $T$ . Moreover,  $T$  may have multiple distinguishing features. Therefore, we must consider the complete set of all distinguishing features, which we call the distinguishing feature family.

**Definition 3.** The set  $\Phi(T, \mathcal{T} \setminus \{T\})$  composed of all distinguishing features of  $T$  with respect to  $\mathcal{T} \setminus \{T\}$  is a *distinguishing feature family* of  $T$ .

Let  $(c_0, \dots, c_n)$  be the outcome of a SCS experiment of  $k$  cells, where  $c_i \geq 0$  is the number of cells observed of clone  $i$  and  $\sum_{i=0}^n c_i = k$ . This experiment is *successful* if, among the  $k$  sequenced cells, we observe the clones of at least one distinguishing feature  $\Pi \in \Phi(T, \mathcal{T} \setminus \{T\})$  — i.e.  $c_i > 0$  for all clones  $i$  in some distinguishing feature  $\Pi \in \Phi(T, \mathcal{T} \setminus \{T\})$ . As discussed, conditioning on frequencies  $\mathbf{f}$  and  $T$  being the true phylogeny, outcomes  $(c_0, \dots, c_n)$  of SCS experiments of  $k$  cells follow a multinomial distribution  $\text{Mult}(k, u_0, \dots, u_n)$  where  $\mathbf{u}(T, \mathbf{f}) = [u_i]$  is defined as in (1). Let  $Y_k$  denote the event of a successful outcome. We are interested in computing the probability  $\Pr(Y_k \mid \mathbf{u}(T, \mathbf{f}))$ , which equals the sum of the probabilities of all successful outcomes. More specifically, we want to determine the smallest number  $k^*$  of single cells to sequence such that  $\Pr(Y_{k^*} \mid \mathbf{u}(T, \mathbf{f}))$  is at least the prescribed confidence level  $\gamma$  (Fig. 2).

**Problem 2** (SCS POWER CALCULATION FOR PHYLOGENY  $T$  (T-SCS-PC)). Given a set  $\mathcal{T}$  of candidate phylogenies and a phylogeny  $T \in \mathcal{T}$ , frequencies  $\mathbf{f}$  and confidence level  $\gamma$ , find the minimum number  $k^*$  of single cells needed such that  $\Pr(Y_k \mid \mathbf{u}(T, \mathbf{f})) \geq \gamma$ .

Section A.1 proves that the above problem is NP-hard.

**Theorem 1.**  $T$ -SCS-PC is NP-hard.



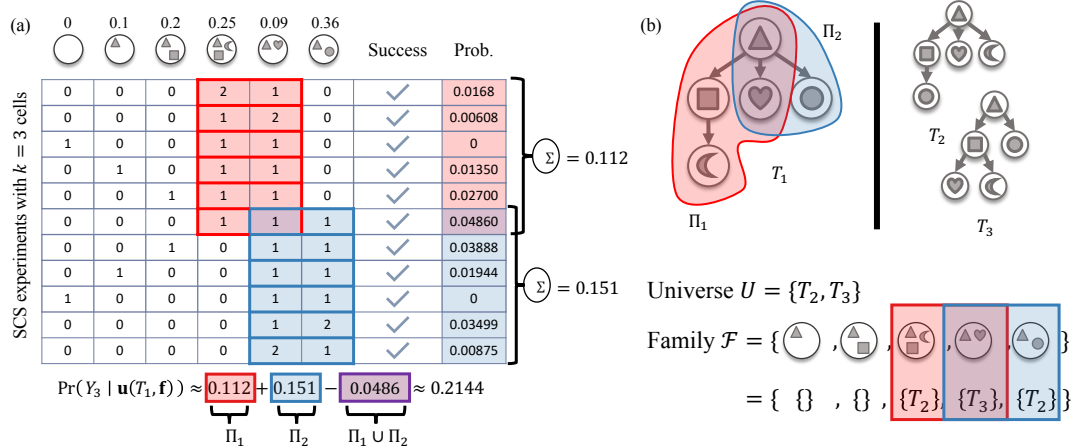

Figure 3: **PhyDOSE implementation details.** (a) To account for minimal distinguishing features that share featurettes, we use the inclusion-exclusion principle to compute  $\Pr(Y_k | \mathbf{u}(T, \mathbf{f}))$ . Here,  $\Pi_1$  (red) and  $\Pi_2$  (blue) share a featurette (with ‘triangle’ and ‘heart’ mutations). (b) To enumerate the set  $\Phi^*$  of minimal distinguishing features of  $T_1$ , we reduce the problem to SET COVER and repeatedly identify minimum covers. Here, the universe  $U$  is composed of trees  $\{T_2, T_3\}$  and there is a subset in  $\mathcal{F}$  for each featurette  $\tau$  of  $T_1$  composed of the trees where  $\tau$  is absent.

### 3 Methods

We introduce Phylogenetic Design Of Single-cell sequencing Experiments (PhyDOSE), a method to determine the number of single cells to sequence to identify the true phylogeny given initial bulk sequencing data. PhyDOSE is implemented in C++/R and is available at <https://github.com/elkebir-group/PhyDOSE>. This section describes the various methodological components of PhyDOSE.

#### 3.1 Multinomial Power Calculation

To solve the  $T$ -SCS-PC problem, it suffices to have an algorithm that computes  $\Pr(Y_k | \mathbf{u}(T, \mathbf{f}))$ , which is the probability of concluding that  $T$  is the true phylogeny. Using this algorithm we identify  $k^*$  by starting from  $k = 0$  and simply incrementing  $k$  until the corresponding probability  $\Pr(Y_k | \mathbf{u}(T, \mathbf{f}))$  exceeds the prescribed confidence level  $\gamma$ . In the following, we describe how to efficiently compute  $\Pr(Y_k | \mathbf{u}(T, \mathbf{f}))$ .

Recall that the outcome of a SCS experiment composed of  $k$  cells corresponds to a vector  $\mathbf{c} = [c_i]$ , where  $c_i \geq 0$  is the number of cells that we observe from clone  $i$  and  $\sum_{i=0}^n c_i = k$ . In a successful outcome  $\mathbf{c}$  we observe at least one cell for each featurette in at least one distinguishing feature  $\Pi \in \Phi(T, \mathcal{T} \setminus \{T\})$ , where  $\Phi(T, \mathcal{T} \setminus \{T\})$  is the distinguishing feature family. For brevity, we will write  $\Phi$  rather than  $\Phi(T, \mathcal{T} \setminus \{T\})$ . Let  $\mathbf{c}(\Pi, k)$  denote the set of all outcomes where we observe at least one cell for each featurette in a distinguishing feature  $\Pi$  — i.e.  $\sum_{i=0}^n c_i = k$ , and for all  $i \in \{0, \dots, n\}$  it holds that  $c_i > 0$  if clone  $i$  is a featurette in  $\Pi$  and  $c_i \geq 0$  otherwise. The set  $\mathbf{c}(\Phi, k)$  of successful outcomes is defined as the union  $\bigcup_{\Pi \in \Phi} \mathbf{c}(\Pi, k)$ . The probability of any SCS outcome  $\mathbf{c} = (c_0, \dots, c_n)$  is distributed according to  $\text{Mult}(k, \mathbf{u}(T, \mathbf{f}))$ . Since successful outcomes enable us to conclude that  $T$  is the true phylogeny, we have

$$\Pr(Y_k | \mathbf{u}(T, \mathbf{f})) = \sum_{\ell \in \mathbf{c}(\Phi, k)} \text{Mult}(\ell | k, \mathbf{u}(T, \mathbf{f})) = \sum_{\ell \in \mathbf{c}(\Phi, k)} \frac{k!}{\prod_{i=0}^n \ell_i!} \prod_{i=0}^n u_i^{\ell_i}. \quad (2)$$

If there is only one distinguishing feature  $\Pi$ , i.e.  $\Phi = \{\Pi\}$ , then the desired probability is a standard tail probability of the multinomial where we sum up the probabilities of outcomes  $\mathbf{c}(\Pi, k) = [c_i]$  such that

$\sum_{i=0}^n c_i = k$ ,  $c_i > 0$  if clone  $i$  is a featurette of  $\Pi$  and  $c_i \geq 0$  otherwise. Davis *et al.* (2019) have developed a method titled SCOPIT that performs a fast calculation of this tail probability using a connection to the conditional probability of independent Poisson random variables described by Levin (1981). If there are multiple distinguishing features but they are pairwise disjoint — i.e. no two distinct distinguishing features share the same featurette — then we simply have

$$\Pr(Y_k \mid \mathbf{u}(T, \mathbf{f})) = \sum_{\Pi \in \Phi} \sum_{\ell \in \mathbf{c}(\Pi, k)} \text{Mult}(\ell \mid k, \mathbf{u}(T, \mathbf{f})), \quad (3)$$

and we can apply the fast computation (Davis *et al.*, 2019) to obtain each independent tail probability. However, the equality in the above equation does not hold if the family  $\Phi$  is composed of distinguishing features with overlapping featurettes. Incorrectly applying this equation will lead us to overestimate the value of  $k^*$ . Since single-cell sequencing is expensive, overestimating the number of cells to sequence in a SCS experiment can be costly and unnecessary. One naive way would be to simply brute force all  $(n+1)^k$  SCS outcomes, but this will not scale. Instead, to calculate  $\Pr(Y_k \mid \mathbf{u}(T, \mathbf{f}))$  exactly, we propose to use the inclusion-exclusion principle as follows.

$$\Pr(Y_k \mid \mathbf{u}(T, \mathbf{f})) = \sum_{\emptyset \subseteq \Phi' \subseteq \Phi} (-1)^{|\Phi'|+1} \sum_{\ell \in \mathbf{c}(I(\Phi'), k)} \text{Mult}(\ell \mid k, \mathbf{u}(T, \mathbf{f})), \quad (4)$$

where  $I(\Phi')$  is the set of all featurettes in  $\Phi'$ , i.e.  $I(\Phi') = \bigcup_{\Pi \in \Phi'} \Pi$  (Fig. 3a).

Thus, we need to compute  $2^{|\Phi|} - 1$  tail probabilities, which each can be done using the fast calculation in SCOPIT (Davis *et al.*, 2019). In the worst case,  $\Phi$  has  $O(2^n)$  distinguishing features resulting in  $O(2^n)$  tail probabilities. We now describe one final optimization that will significantly reduce the number of required computations. This is based on the following observation.

**Observation 1.** If  $\Pi$  is a distinguishing feature of  $T$  then for all featurettes  $\tau$  present in  $T$  it holds that  $\Pi \cup \{\tau\}$  is a distinguishing feature of  $T$ .

This means that distinguishing features in  $\Phi$  form a partially ordered set under the set inclusion relation. We call a distinguishing feature  $\Pi$  *minimal* if there does not exist another distinguishing feature  $\Pi' \in \Phi$  that is a proper subset of  $\Pi$ , i.e.  $\Pi' \subsetneq \Pi$ . A direct consequence of Observation 1 is that the outcome of an SCS experiment is successful when we observe all featurettes of a distinguishing feature  $\Pi$ , and remains so even if we observe additional featurettes  $\tau' \notin \Pi$ . As such, successful outcomes w.r.t.  $\Phi$  equal those w.r.t. the set  $\Phi^*$  of all minimal distinguishing features of  $T$ .

**Observation 2.** It holds that  $\mathbf{c}(\Phi^*, k) = \mathbf{c}(\Phi, k)$ .

Therefore, it suffices to restrict our attention to only  $\Phi^*$  rather than the complete family  $\Phi$  when computing  $\Pr(Y_k \mid \mathbf{u}(T, \mathbf{f}))$  using (4). Section A.2.1 describes how to find  $\Phi^*$  by reducing the problem to that of finding all minimal set covers, which we solve in an iterative fashion using integer linear programming.

### 3.2 Consideration of SCS Error Rates

One current challenge with SCS is that the false negative rate per site is quite high with typical rates up to 0.4 for the commonly used multiple displacement amplification (MDA) method (Fu *et al.*, 2015). On the other hand, current false positive rates are low and are typically less than 0.0005 for MDA-based whole-genome amplification (Fu *et al.*, 2015). A *false negative* is defined as not observing a mutation that is present in the cell. A *false positive* occurs when we observe the presence of a mutation that did not occur in that cell.

Our method can easily be adjusted when the false negative rate  $\beta$  is known. The probability of a true positive corresponds to  $1 - \beta$ . To observe a featurette/clone  $i$  that has  $n_i$  mutations and a prevalence of

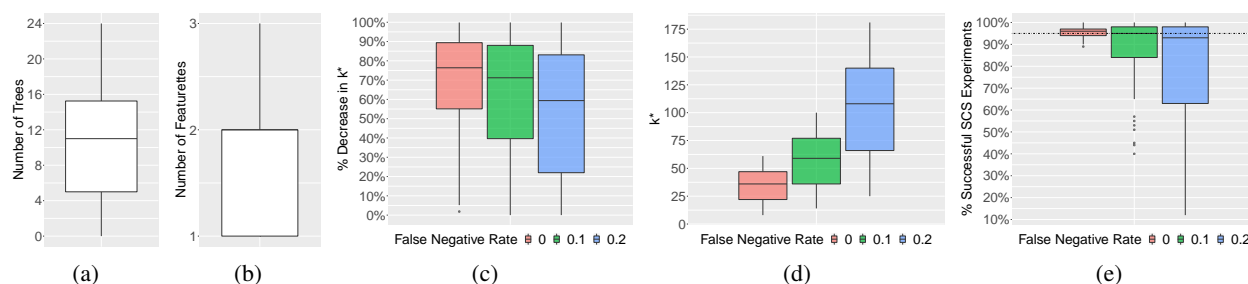

**Figure 4: Simulations demonstrate that PhyDOSE’s calculated number of cells resolves tree ambiguity.** We used confidence level  $\gamma = 0.95$  to determine the number  $k^*$  of single cells to sequence. (a) Number  $|\mathcal{T}|$  of trees output by SPRUCE (El-Kebir *et al.*, 2015). (b) Number  $|\Pi|$  of featurettes among minimal distinguishing features  $\Phi^*$ . (c) Percent decrease in  $k^*$  when utilizing PhyDOSE instead of the naive method. (d) Number  $k^*$  of cells identified by PhyDOSE. (e) Success rate of *in silico* SCS experiments (100 trials).

$u_i$ , we thus need to have  $n_i$  true positives. Thus, we derive new clonal prevalences  $\mathbf{u}'(T, \mathbf{f}, \beta) = [u'_i]$  from  $\mathbf{u}(T, \mathbf{f}) = [u_i]$ . For each  $i \in \{1, \dots, n\}$ , we set  $u'_i = u_i(1 - \beta)^{n_i}$  where  $n_i$  is the number of mutations in featurette/clone  $i$ . We set  $u'_0$  to be equal to  $1 - \sum_{i=1}^n u'_i$ . This adjustment result in a reduction of the clonal prevalences and ultimately increases the value of  $k^*$ . The issue of false positives is less serious as error rates are low enough to be negligible.

### 3.3 Determining the True Phylogeny $T^*$

The final step is to determine the true phylogeny  $T^*$  after performing a SCS experiment with the number  $k^*$  of cells computed by PhyDOSE. To this end, we compute the *support* of each tree  $T \in \mathcal{T}$ . Intuitively,  $\text{support}(T)$  is the number of cells that support the conclusion that  $T$  is the true phylogeny. Formally, we say that a distinguishing feature  $\Pi$  of a tree  $T$  is *observed* if each featurette of  $\Pi$  is observed in at least one cell. Using this, we define  $\text{support}(T)$  as the number of cells that correspond to featurettes of an observed distinguishing feature  $\Pi$  of  $T$ . Per Observation 1, it suffices to restrict our attention to the set  $\Pi^*$  of minimal distinguishing features. There are two outcomes of a SCS experiment with  $k^*$  cells. Either there is no tree  $T \in \mathcal{T}$  with non-zero support or there are one or more trees with non-zero support. In the former case, the SCS experiment has failed, which is expected to occur with probability  $1 - \gamma$ . In the latter case, which may occur in the presence of false negatives and false positives, we return the set of trees with maximum support.

## 4 Results

In this section, we demonstrate the application of PhyDOSE to simulated and real data. Section 4.1 provides results for simulated data. Section 4.2 provides retrospective results for a leukemia patient where both bulk and single-cell DNA sequencing have been performed (Gawad *et al.*, 2014). Finally, Section 4.3 uses PhyDOSE to perform a prospective analysis to determine the required number of single cells to identify the true phylogeny in a lung cancer patient cohort (Jamal-Hanjani *et al.*, 2017).

### 4.1 Simulated data

To assess the performance of PhyDOSE, we generated simulated data where the ground truth tree  $T^*$  is known. Given a fixed number  $n$  of mutations, we first generated a ground truth tree  $T^*$  with  $n$  vertices uniformly at random using Prüfer sequences (Prüfer, 1918). Next, we generated clonal prevalences  $\mathbf{u} = [u_i]$



by drawing from a symmetric  $n + 1$ -dimensional Dirichlet distribution with concentration parameter 0.2. We used rejection sampling to ensure that each clonal prevalence  $u_i$  was at least 0.05. Let  $\sigma(i)$  be the set of clones that contain mutation  $i$ . We generated frequencies  $\mathbf{f} = [f_i]$  by setting  $f_i = \sum_{j \in \sigma(i)} u_j$  for each mutation  $i \in \{1, \dots, n\}$ . We used the SPRUCE algorithm (El-Kebir *et al.*, 2015) to enumerate the set  $\mathcal{T}$  of trees given frequencies  $\mathbf{f}$ . Finally, we considered varying false negative rates  $\beta \in \{0, 0.1, 0.2\}$ . In order to validate our method, we generated, for each simulation instance, 10000 single cells sampled according to the clonal prevalences  $\mathbf{u}$  and under the specified false negative rates  $\beta$  from the clones of the ground truth tree  $T^*$ . In total, we generated 100 simulation instances for  $n = 5$  mutations and each value of  $\beta$ .

The number  $|\mathcal{T}|$  of trees in our simulations ranged from 1 to 25 with a median of 11 trees per simulation instance (Fig. 4a). We ran PhyDOSE to identify the minimal distinguishing feature family  $\Phi^*$  for each tree in each simulation instance, which yielded a single minimum distinguishing feature in each case. Fig. 4b shows the number of featurettes in each minimal distinguishing feature identified by PhyDOSE for each tree in each simulation instance, ranging from 1 to 3 with a median of 2. Importantly, this number is smaller than the total number of 5 featurettes. As such, running PhyDOSE resulted in a median reduction of  $\sim 76\%$  in the number of cells needed to identify the true tree  $T^*$  compared to the naive approach of requiring all featurettes/clones to be observed (Fig. 3c). In particular, with a confidence level of  $\gamma = 0.95$ , PhyDOSE computed a median number of  $k^* = 36$  single cells to identify the true phylogeny  $T^*$  (Fig. 4d) compared to a median number of  $k^* = 127$  single cells proposed by the naive method (Fig. S3). Upon performing 100 *in silico* SCS experiments with PhyDOSE's number  $k^*$  of cells for each simulation, we observed that a median of 96% of experiments uniquely identified  $T^*$  (Fig. 4e). With increasing false negative rates  $\beta \in \{0, 0.1, 0.2\}$  we observed that (i) PhyDOSE continued to outperform the naive method (Fig. 4c), (ii) more cells were needed to identify  $T^*$  (Fig. 4d), but (iii) the median fraction of successful *in silico* SCS experiments remained close to  $\gamma = 0.95$  although variance increased (Fig. 4e).

In summary, our simulations demonstrate that PhyDOSE's distinguishing feature analysis results in significantly fewer cells to sequence than the naive approach without a subsequent loss in power to identify the true phylogeny. Moreover, we find that PhyDOSE is robust to increasing values of false negatives rates that are typical to real data.

## 4.2 Retrospective Analysis of a Leukemia Patient

We considered a cohort of six childhood acute lymphoblastic leukemia (ALL) patients whose blood was sequenced using bulk and targeted single-cell DNA sequencing (Gawad *et al.*, 2014). The number of sequenced single cells per patient varied between 96 and 150. To validate our approach, we used PhyDOSE to calculate the number  $k(T^*)$  of cells needed to identify the true phylogeny  $T^*$  that is consistent with both data types, thereby retrospectively determining whether fewer single cells suffice to determine  $T^*$ , decreasing the cost of replicate experiments. In addition, we assessed whether the calculated number  $k(T^*)$  yielded  $T^*$  using *in silico* SCS experiments.

Recall that PhyDOSE relies on two key assumptions, i.e. (i) a correspondence between mutation frequencies in the bulk and SCS data, and (ii) the presence of  $T^*$  among the trees  $\mathcal{T}$  inferred from the bulk data under the infinite sites assumption. Only patient 2 satisfied both criteria (as detailed in Section A.3). Gawad *et al.* (2014) sequenced 16 autosomal mutations in 115 cells for this patient. Using the infinite sites assumption and assuming the absence of copy-number aberrations, we define the cancer cell fraction, or frequency  $f_i$  of each mutation  $i$  in the bulk data as  $2 \cdot \text{VAF}(i)$ . We define the *SCS mutation frequency* as the fraction of single cells that harbor the mutation. Strikingly, there is a clear correlation between the bulk and SCS mutation frequencies, supporting PhyDOSE's first assumption (Fig. 5a). We excluded mutation *CMTM8* because of a notable discrepancy in frequencies (0.4 in bulk vs. 0.2 in SCS). Using SPRUCE (El-Kebir *et al.*, 2015), we enumerated the set  $\mathcal{T}$  of trees from the bulk data, yielding over 2.5 million trees. This number is mainly driven by 3 mutations (*ATRNL1*, *LINC00052* and *TRRAP*) with a VAF less than 0.05.

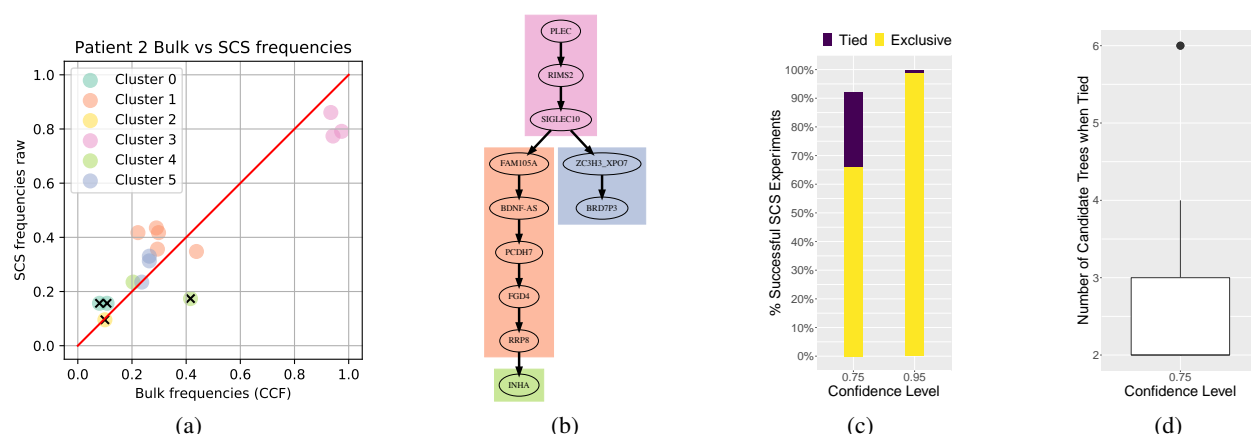

**Figure 5: Retrospective analysis of ALL patient 2 demonstrates that fewer cells suffice for replication.**

(a) There is a strong correlation between bulk and single-cell mutation frequencies. Colors indicate mutation clusters from SCS data and excluded mutations are indicated by 'x'. (b) Phylogeny  $T^*$  that is consistent with the SCS and bulk data. (c) Percent of successful outcomes in 100 *in silico* SCS experiments, obtained by sampling from the 115 sequenced cells without replacement following PhyDOSE's calculated number  $k(T^*)$  of cells (103 for  $\gamma = 0.95$  and 50 for  $\gamma = 0.75$ ). Exclusive outcomes (yellow) uniquely identified  $T^*$  whereas tied outcomes (purple) yielded a small set of candidate phylogenies that include  $T^*$ . (d) Number of candidate phylogenies in the case of ties.

Excluding these 3 mutations resulted in a more tractable number of 2576 trees. Fig. 5b shows the single tree  $T^* \in \mathcal{T}$  that was consistent with the cleaned single-cell data, supporting PhyDOSE's second assumption.

We ran PhyDOSE using varying confidence levels  $\gamma \in \{0.75, 0.95\}$  and an estimated false negative rate of  $\beta = 0.2$ . PhyDOSE calculated that  $k(T^*) = 103$  cells suffice to identify  $T^*$  with confidence level  $\gamma = 0.95$ . Indeed, performing 100 *in silico* SCS experiments, by sampling  $k(T^*)$  cells among the 115 sequenced cells without replacement, yielded a success rate of 99% (Fig. 5c). To reduce costs, we explored what would have happened retrospectively with a lower confidence level  $\gamma$  of 0.75. PhyDOSE calculated that  $k(T^*) = 50$  cells are needed for  $\gamma = 0.75$ , which is a significant cost savings over  $\gamma = 0.95$ . Performing 100 *in silico* SCS experiments yielded a success rate of uniquely identifying  $T^*$  of 66%, which was lower than the expected rate of 75%. Furthermore, we noted that in an additional 26% of experiments the correct phylogeny  $T^*$  was among the trees with the highest overall support (Fig. 5c). The number of trees in the tied set of successes varied from 2 to 6 (Fig. 5d), showing that although PhyDOSE did not uniquely identify the tree, it was able to significantly reduce the original set of 2576 trees (Figs. S4 and S5).

In summary, this retrospective analysis shows that the true tree for patient 2 could have been identified confidently with fewer cells than the 115 cells sequenced by Gawad *et al.* (2014). With a lower confidence level  $\gamma$ , PhyDOSE computes that far fewer cells are required, significantly reducing costs but at the expense of a lower success rate of uniquely identifying the true phylogeny. Nevertheless, the resulting SCS experiment will eliminate a large fraction of the original set of candidate phylogenies due to the incorporation of distinguishing features in the PhyDOSE power calculation.

### 4.3 Prospective Analysis of a Lung Cancer Cohort

Using PhyDOSE, we prospectively determined the number of cells needed to uniquely identify the true phylogeny for the 25 out of 100 patients in the TRACERx non-small-cell lung cancer cohort that have multiple candidate trees (Jamal-Hanjani *et al.*, 2017). The authors previously identified the set of candidate

trees  $\mathcal{T}$  for each patient using CITUP (Malikic *et al.*, 2015) after clustering mutations with PyClone (Roth *et al.*, 2014). Jamal-Hanjani *et al.* (2017) reported the cancer cell fraction of each mutation cluster in each bulk sample. The number of trees in the candidate set for each patient ranged from 2 to 17, with each containing mutation clusters with between 5 and 882 mutations (Table S6).

Unlike in the simulations and ALL patient 2, multiple bulk samples per patient were available for analysis. Therefore, we calculated  $k^*$  for each sample independently for all 25 patients at varying confidence level  $\gamma \in \{0.75, 0.95\}$ . Mutation clusters alleviate the issue of false negatives, i.e. it suffices to only observe a single mutation to impute the presence of the other mutations in the same cluster. Here, with a typical SCS false negative rate of 0.2, the probability of all mutations in the smallest cluster (with size 5) dropping out thus equals  $0.2^5 = 0.00032$ , a probability that can be neglected. As such, we set  $\beta = 0$ . The reported  $k^*$  value is the minimum  $k^*$  over the set of available samples, subsequently identifying which of the samples is the best to utilize for the SCS experiment. PhyDOSE was able to return a finite value of  $k^*$  for 23 out of the 25 patients. PhyDOSE will return  $\infty$  when for each sample of the patient there is a featurette in every distinguishing feature where the clonal prevalence is 0. For two of the 23 patients the calculated  $k^*$  was over 400 due to featurettes in the distinguishing features with low clonal prevalences. For the remaining 21 patients, the median value of  $k^*$  was 29 for  $\gamma = 0.95$  and 14 for  $\gamma = 0.75$  (Fig. S6). These strikingly low values of  $k^*$  for the majority of the 25 patients with multiple candidate trees demonstrate the benefit of using PhyDOSE to strategically optimize the design of follow-up single cell experiments.

## 5 Discussion

In this work, we showed that the mutation frequencies  $\mathbf{f}$  and the set  $\mathcal{T}$  of tumor phylogenies inferred from initial bulk data contain valuable information to provide guidance for follow-up SCS experiments. We introduced PhyDOSE, a method to calculate the number  $k^*$  of single cells needed to infer the true phylogeny  $T^*$  given  $\mathbf{f}$ ,  $\mathcal{T}$  and a user-specified confidence level  $\gamma$ . Underpinning our method is the observation that often only a subset of clones suffices to distinguish one tree  $T \in \mathcal{T}$  from the remaining trees  $\mathcal{T} \setminus \{T\}$ . Thus, by observing cells in a follow-up SCS experiment from these distinguishing clones — the probability of which we model as a tail probability of a multinomial distribution — we can definitively conclude that  $T$  is the true phylogeny. We validated PhyDOSE using simulations and a retrospective analysis of a leukemia patient, concluding that PhyDOSE’s computed number  $k^*$  of cells resolves tree ambiguity, even in the presence of SCS errors. In a prospective analysis, we demonstrated that only a small number of cells suffice to disambiguate the solution space of trees in a recent lung cancer cohort. In summary, PhyDOSE proposes cost-efficient SCS experiments that will yield high-fidelity phylogenies, which will consequently improve downstream analyses in cancer genomics aimed at deepening our understanding of cancer biology.

There are several future research directions. First, in the case of multiple bulk samples, rather than selecting cells from a single sample, a better strategy would be to select cells across samples. To model this accurately, we must consider a multinomial mixture model. Second, to further reduce SCS costs, we might want to include a mutation selection step as part of our approach to perform targeted rather than whole-genome sequencing. Third, similar ideas can be used to design follow-up sequencing experiments using alternative sequencing technologies such as long read sequencing. Fourth, we plan to replace the integer linear program used for identifying minimal distinguishing features with a combinatorial algorithm. This will enable us to develop an easy-to-use and install R package with a Shiny user interface. Fifth, to improve robustness in the presence of SCS errors, we plan to explore alternative definitions of successful SCS experiment outcomes, requiring that more than one cells is observed of each featurette of a distinguishing feature. Sixth, we plan to explore evolutionary models beyond the infinite sites model, such as the Dollo parsimony model where mutations might be lost (El-Kebir, 2018). Finally, the concept of distinguishing features may be useful to summarize diverse solution spaces in cancer phylogenetics (Aguse *et al.*, 2019).

**Acknowledgements.** This work was supported by UIUC Center for Computational Biotechnology and Genomic Medicine (grant: CSN 1624790) and the National Science Foundation (grant: CCF 1850502).

## References

- Aguse, N., Qi, Y., and El-Kebir, M. (2019). Summarizing the solution space in tumor phylogeny inference by multiple consensus trees. *Bioinformatics*, **35**(14), i408–i416.
- Bolli, N., Avet-Loiseau, H., Wedge, D. C., Van Loo, P., Alexandrov, L. B., Martincorena, I., Dawson, K. J., Iorio, F., Nik-Zainal, S., Bignell, G. R., Hinton, J. W., Li, Y., Tubio, J. M. C., McLaren, S., O’ Meara, S., Butler, A. P., Teague, J. W., Mudie, L., Anderson, E., Rashid, N., Tai, Y.-T., Shamma, M. A., Sperling, A. S., Fulciniti, M., Richardson, P. G., Parmigiani, G., Magrangeas, F., Minvielle, S., Moreau, P., Attal, M., Facon, T., Futreal, P. A., Anderson, K. C., Campbell, P. J., and Munshi, N. C. (2014). Heterogeneity of genomic evolution and mutational profiles in multiple myeloma. *Nature communications*, **5**.
- Davis, A., Gao, R., and Navin, N. E. (2019). SCOPIT: sample size calculations for single-cell sequencing experiments. *BMC bioinformatics*, **20**(1), 566.
- Dentro, S. C., Wedge, D. C., and Van Loo, P. (2017). Principles of Reconstructing the Subclonal Architecture of Cancers. *Cold Spring Harbor Perspectives in Medicine*, **7**(8), a026625.
- Deshwar, A. G., Vembu, S., Yung, C. K., Jang, G. H., Stein, L., and Morris, Q. (2015). Phylowgs: Reconstructing subclonal composition and evolution from whole-genome sequencing of tumors. *Genome Biology*, **16**(1), 35.
- El-Kebir, M. (2018). SPhyR: tumor phylogeny estimation from single-cell sequencing data under loss and error. *Bioinformatics*, **34**(17), i671–i679.
- El-Kebir, M., Oesper, L., Acheson-Field, H., and Raphael, B. J. (2015). Reconstruction of clonal trees and tumor composition from multi-sample sequencing data. *Bioinformatics*, **31**(12), i62–i70.
- El-Kebir, M., Satas, G., Oesper, L., and Raphael, B. J. (2016). Inferring the Mutational History of a Tumor Using Multi-state Perfect Phylogeny Mixtures. *Cell Systems*, **3**(1), 43–53.
- Fu, Y., Li, C., Lu, S., Zhou, W., Tang, F., Xie, X. S., and Huang, Y. (2015). Uniform and accurate single-cell sequencing based on emulsion whole-genome amplification. *Proceedings of the National Academy of Sciences of the United States of America*, **112**(38), 11923–11928.
- Gawad, C., Koh, W., and Quake, S. R. (2014). Dissecting the clonal origins of childhood acute lymphoblastic leukemia by single-cell genomics. *Proceedings of the National Academy of Sciences*, **111**(50), 17947–17952.
- Jahn, K., Kuipers, J., and Beerenwinkel, N. (2016). Tree inference for single-cell data. *Genome Biology*, **17**(1), 86.
- Jamal-Hanjani, M., Wilson, G. A., McGranahan, N., Birkbak, N. J., Watkins, T. B., Veeriah, S., Shafi, S., Johnson, D. H., Mitter, R., Rosenthal, R., *et al.* (2017). Tracking the evolution of non–small-cell lung cancer. *New England Journal of Medicine*, **376**(22), 2109–2121.
- Karp, R. M. (1972). *Reducibility among Combinatorial Problems*, pages 85–103. Springer.

- Kim, C., Gao, R., Sei, E., Brandt, R., Hartman, J., Hatschek, T., Crosetto, N., Foukakis, T., and Navin, N. E. (2018). Chemoresistance evolution in triple-negative breast cancer delineated by single-cell sequencing. *Cell*, **173**(4), 879–893.
- Kuboki, Y., Fischer, C. G., Guthrie, V. B., Huang, W., Yu, J., Chianchiano, P., Hosoda, W., Zhang, H., Zheng, L., Shao, X., Thompson, E. D., Waters, K., Poling, J., He, J., Weiss, M. J., Wolfgang, C. L., Goggins, M. G., Hruban, R. H., Roberts, N. J., Karchin, R., and Wood, L. D. (2019). Single-cell sequencing defines genetic heterogeneity in pancreatic cancer precursor lesions. *The Journal of Pathology*, **247**(3), 347–356.
- Leung, M. L., Davis, A., Gao, R., Casasent, A., Wang, Y., Sei, E., Sanchez, E., Maru, D., Kopetz, S., and Navin, N. E. (2017). Single cell DNA sequencing reveals a late-dissemination model in metastatic colorectal cancer. *Genome Research*, page gr.209973.116.
- Levin, B. (1981). A Representation for Multinomial Cumulative Distribution Functions. *The Annals of Statistics*, **9**(5), 1123–1126.
- Łuksza, M., Riaz, N., Makarov, V., Balachandran, V. P., Hellmann, M. D., Solovyov, A., Rizvi, N. A., Merghoub, T., Levine, A. J., Chan, T. A., Wolchok, J. D., and Greenbaum, B. D. (2017). A neoantigen fitness model predicts tumour response to checkpoint blockade immunotherapy. *Nature*, **551**(7681), 517.
- Malikic, S., McPherson, A. W., Donmez, N., and Sahinalp, C. S. (2015). Clonality inference in multiple tumor samples using phylogeny. *Bioinformatics*.
- Malikic, S., Jahn, K., Kuipers, J., Sahinalp, S. C., and Beerenwinkel, N. (2019a). Integrative inference of subclonal tumour evolution from single-cell and bulk sequencing data. *Nature communications*, **10**(1), 1–12.
- Malikic, S., Mehrabadi, F. R., Ciccolella, S., Rahman, M. K., Ricketts, C., Haghshenas, E., Seidman, D., Hach, F., Hajirasouliha, I., and Sahinalp, S. C. (2019b). PhISCS: a combinatorial approach for subperfect tumor phylogeny reconstruction via integrative use of single-cell and bulk sequencing data. *Genome Research*, **29**(11), 1860–1877.
- McGranahan, N., Favero, F., de Bruin, E. C., Birkbak, N. J., Szallasi, Z., and Swanton, C. (2015). Clonal status of actionable driver events and the timing of mutational processes in cancer evolution. *Science Translational Medicine*, **7**(283), 283ra54–283ra54.
- McPherson, A., Roth, A., Laks, E., Masud, T., Bashashati, A., Zhang, A. W., Ha, G., Biele, J., Yap, D., Wan, A., Prentice, L. M., Khattra, J., Smith, M. A., Nielsen, C. B., Mullaly, S. C., Kalloger, S., Karnezis, A., Shumansky, K., Siu, C., Rosner, J., Chan, H. L., Ho, J., Melnyk, N., Senz, J., Yang, W., Moore, R., Mungall, A. J., Marra, M. a., Bouchard-Côté, A., Gilks, C. B., Huntsman, D. G., McAlpine, J. N., Aparicio, S., and Shah, S. P. (2016). Divergent modes of clonal spread and intraperitoneal mixing in high-grade serous ovarian cancer. *Nature Genetics*.
- Navin, N. E. (2014). Cancer genomics: one cell at a time. *Genome Biology*, **15**(8), 452.
- Nowell, P. C. (1976). The clonal evolution of tumor cell populations. *Science*, **194**(4260), 23–8.
- Popic, V., Salari, R., Hajirasouliha, I., Kashef-Haghighi, D., West, R. B., and Batzoglou, S. (2015). Fast and scalable inference of multi-sample cancer lineages. *Genome biology*, **16**(1), 91.
- Prüfer, H. (1918). Neuer beweis eines satzes uber permutationen. *Arch Math Phys*, **27**, 742–4.



- Ross, E. M. and Markowetz, F. (2016). OncoNEM: inferring tumor evolution from single-cell sequencing data. *Genome Biology*, **17**(1), 69.
- Roth, A., Khattra, J., Yap, D., Wan, A., Laks, E., Biele, J., Ha, G., Aparicio, S., Bouchard-Côté, A., and Shah, S. P. (2014). PyClone: statistical inference of clonal population structure in cancer. *Nature methods*, **11**(4), 396–398.
- Stephens, P. J., Tarpey, P. S., Davies, H., Van Loo, P., Greenman, C., Wedge, D. C., Nik-Zainal, S., Martin, S., Varela, I., Bignell, G. R., Yates, L. R., Papaemmanuil, E., Beare, D., Butler, A., Cheverton, A., Gamble, J., Hinton, J., Jia, M., Jayakumar, A., Jones, D., Latimer, C., Lau, K. W., McLaren, S., McBride, D. J., Menzies, A., Mudie, L., Raine, K., Rad, R., Chapman, M. S., Teague, J., Easton, D., Langerød, A., OSBREAC, T. O. B. C. C., Karesen, R., Schlichting, E., Naume, B., Sauer, T., Ottestad, L., Lee, M. T. M., Shen, C.-Y., Tee, B. T. K., Huimin, B. W., Brooks, A., Vargas, A. C., Turashvili, G., Martens, J., Fatima, A., Miron, P., Chin, S.-F., Thomas, G., Boyault, S., Mariani, O., Lakhani, S. R., van de Vijver, M., van t Veer, L., Foekens, J., Desmedt, C., Sotiriou, C., Tutt, A., Caldas, C., Reis Filho, J. S., Aparicio, S. A. J. R., Salomon, A. V., Børresen-Dale, A.-L., Richardson, A. L., Campbell, P. J., Futreal, P. A., and Stratton, M. R. (2012). The landscape of cancer genes and mutational processes in breast cancer. *Nature*, **486**(7403), 400–404.
- Turajlic, S., Xu, H., Litchfield, K., Rowan, A., Horswell, S., Chambers, T., O’Brien, T., Lopez, J. I., Watkins, T. B. K., Nicol, D., Stares, M., Challacombe, B., Hazell, S., Chandra, A., Mitchell, T. J., Au, L., Eichler-Jonsson, C., Jabbar, F., Soultati, A., Chowdhury, S., Rudman, S., Lynch, J., Fernando, A., Stamp, G., Nye, E., Stewart, A., Xing, W., Smith, J. C., Escudero, M., Huffman, A., Matthews, N., Elgar, G., Phillimore, B., Costa, M., Begum, S., Ward, S., Salm, M., Boeing, S., Fisher, R., Spain, L., Navas, C., Gronroos, E., Hobor, S., Sharma, S., Aurangzeb, I., Lall, S., Polson, A., Varia, M., Horsfield, C., Fotiadis, N., Pickering, L., Schwarz, R. F., Silva, B., Herrero, J., Luscombe, N. M., Jamal-Hanjani, M., Rosenthal, R., Birkbak, N. J., Wilson, G. A., Pipek, O., Ribli, D., Krzystanek, M., Csabai, I., Szallasi, Z., Gore, M., McGranahan, N., Van Loo, P., Campbell, P., Larkin, J., and Swanton, C. (2018a). Deterministic Evolutionary Trajectories Influence Primary Tumor Growth: TRACERx Renal. *Cell*.
- Turajlic, S., Xu, H., Litchfield, K., Rowan, A., Chambers, T., Lopez, J. I., Nicol, D., O’Brien, T., Larkin, J., Horswell, S., Stares, M., Au, L., Jamal-Hanjani, M., Challacombe, B., Chandra, A., Hazell, S., Eichler-Jonsson, C., Soultati, A., Chowdhury, S., Rudman, S., Lynch, J., Fernando, A., Stamp, G., Nye, E., Jabbar, F., Spain, L., Lall, S., Guarch, R., Falzon, M., Proctor, I., Pickering, L., Gore, M., Watkins, T. B. K., Ward, S., Stewart, A., DiNatale, R., Becerra, M. F., Reznik, E., Hsieh, J. J., Richmond, T. A., Mayhew, G. F., Hill, S. M., McNally, C. D., Jones, C., Rosenbaum, H., Stanislaw, S., Burgess, D. L., Alexander, N. R., and Swanton, C. (2018b). Tracking Cancer Evolution Reveals Constrained Routes to Metastases: TRACERx Renal. *Cell*, **0**(0).
- Yuan, K., Sakoparnig, T., Markowetz, F., and Beerenwinkel, N. (2015). BitPhylogeny: a probabilistic framework for reconstructing intra-tumor phylogenies. *Genome Biology*, **16**(1), 36.
- Zafar, H., Tzen, A., Navin, N., Chen, K., and Nakhleh, L. (2017). SiFit: inferring tumor trees from single-cell sequencing data under finite-sites models. *Genome biology*, **18**(1), 178.
- Zhang, A. W., McPherson, A., Milne, K., Kroeger, D. R., Hamilton, P. T., Miranda, A., Funnell, T., Little, N., de Souza, C. P. E., Laan, S., LeDoux, S., Cochrane, D. R., Lim, J. L. P., Yang, W., Roth, A., Smith, M. A., Ho, J., Tse, K., Zeng, T., Shlafman, I., Mayo, M. R., Moore, R., Failmezger, H., Heindl, A., Wang, Y. K., Bashashati, A., Grewal, D. S., Brown, S. D., Lai, D., Wan, A. N. C., Nielsen, C. B., Huebner, C., Tessier-Cloutier, B., Anglesio, M. S., Bouchard-Côté, A., Yuan, Y., Wasserman, W. W., Gilks, C. B.,

Karnezis, A. N., Aparicio, S., McAlpine, J. N., Huntsman, D. G., Holt, R. a., Nelson, B. H., and Shah, S. P. (2018). Interfaces of Malignant and Immunologic Clonal Dynamics in Ovarian Cancer. *Cell*, **173**(7), 1755–1769.e22.

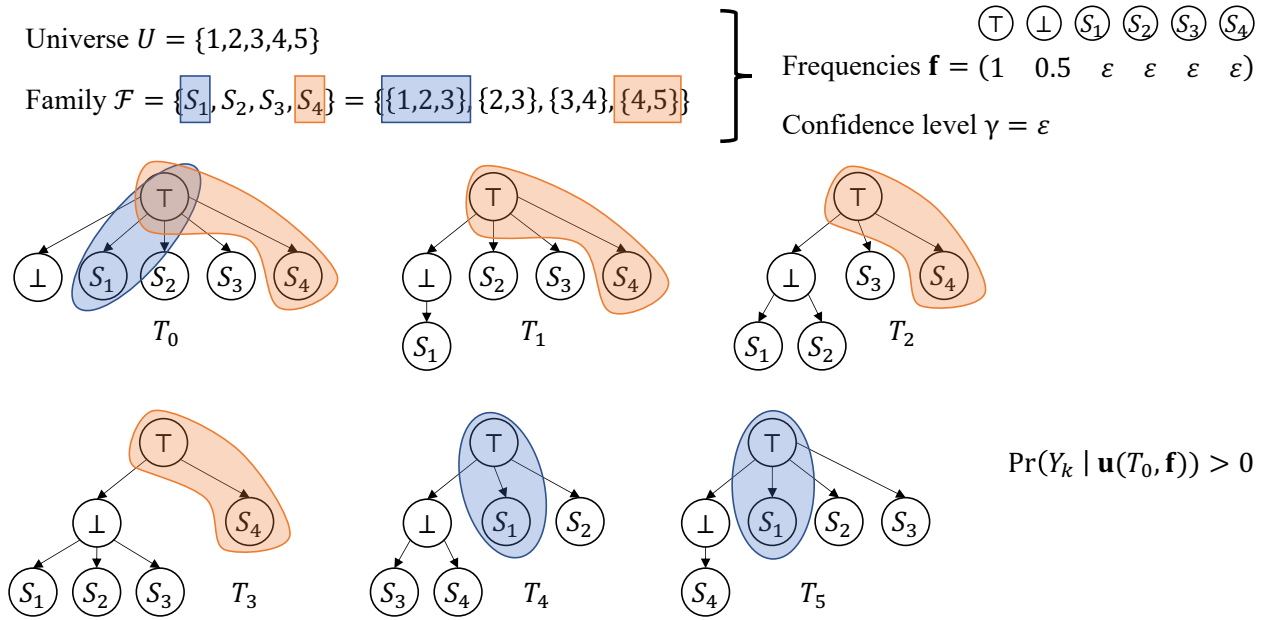

Figure S1: **Reduction from SET COVER to  $T$ -SCS-PC.** Given a family  $\mathcal{F}$  of subsets  $\{S_1, \dots, S_{|\mathcal{F}|}\}$  on a universe  $U = \{1, \dots, n\}$ , we construct  $n + 1$  trees  $\mathcal{T} = \{T_0, \dots, T_n\}$  with mutations  $\{\top, \perp, S_1, \dots, S_{|\mathcal{F}|}\}$ . We seek to distinguish  $T_0$  from the remaining trees  $\{T_1, \dots, T_n\}$ . The key concept captured by the reduction is that there is a cover of size  $k$  if and only if  $\Pr(Y_k | \mathbf{u}(T_0, \mathbf{f}))$  is greater than 0. Here,  $S_1$  and  $S_4$  form a cover of size  $k = 2$  of the universe  $U$  and the corresponding probability  $\Pr(Y_k | \mathbf{u}(T_0, \mathbf{f}))$  is greater than 0.

## A.1 Complexity

**Theorem 2.**  $T$ -SCS-PC is NP-hard.

We prove the theorem using a polynomial-time reduction from the SET COVER problem, a known NP-hard problem (Karp, 1972).

**Problem 3 (SET COVER).** Given a family  $\mathcal{F}$  of subsets  $\{S_1, \dots, S_{|\mathcal{F}|}\}$  over a universe  $U = \{1, \dots, n\}$ , find a cover  $C \subseteq \mathcal{F}$  such that  $\bigcup_{S \in C} S = U$  and  $C$  has minimum cardinality.

Specifically, we reduce a SET COVER instance  $(\mathcal{F}, U)$  to an  $T$ -SCS-PC instance  $(\mathcal{T}, T, \mathbf{f}, \gamma)$  as follows. The set  $\mathcal{T} = \{T_0, \dots, T_n\}$  includes one tree  $T_i$  for each element  $i$  in the universe  $U$  and an additional tree  $T_0$ . All trees in  $\mathcal{T}$  have  $|\mathcal{F}| + 2$  vertices, corresponding to subsets  $\{S_1, \dots, S_{|\mathcal{F}|}\}$  and two additional mutations  $\{\top, \perp\}$ . Each tree in  $\mathcal{T}$  includes the edge  $(\top, \perp)$ . Additionally, if element  $i \in U$  is absent from subset  $S_j$  then there is an edge  $(\top, S_j)$  in tree  $T_i$ , otherwise  $T_i$  includes an edge  $(\perp, S_j)$ . Tree  $T_0$  includes edges  $(\top, S_j)$  for all subsets  $S_j$ . As for the frequencies  $\mathbf{f}$ , we set  $f_{\top} = 1$ ,  $f_{\perp} = 0.5$  and the remaining frequencies  $f_{S_j} = \varepsilon$  for all subsets  $S_j \in \mathcal{F}$ . Moreover, we set the confidence level  $\gamma$  to  $\varepsilon$  as well. In the corresponding  $T$ -SCS-PC instance  $(\mathcal{T}, T_0, \mathbf{f}, \varepsilon)$ , the tree of interest is  $T_0$ . Fig. S1 shows an example.

The key idea is that as  $\gamma = \varepsilon > 0$  is a small positive infinitesimal constant, this  $T$ -SCS-PC instance seeks the smallest number  $k^*$  of cells such that  $\Pr(Y_{k^*} | \mathbf{u}(T_0, \mathbf{f}))$  is non-zero. In particular, this number  $k^*$  of cells will only be achieved if there is a distinguishing feature  $\Pi$  of the same size  $k^*$ . By our reduction, there is a 1-1 correspondence between set covers of  $U$  and distinguishing features  $\Pi$  of  $T_0$  with respect to  $\{T_1, \dots, T_n\}$ . Specifically, a set cover  $C$  of size  $k$  corresponds to a distinguishing feature  $\Pi(C)$  of the same size  $k$ , and vice versa. As such, we have the following lemma whose proof is in the supplement.

**Lemma 1.** Let  $(\mathcal{T}, T_0, \mathbf{f}, \gamma = \varepsilon)$  be the  $T$ -SCS-PC instance corresponding to SET COVER instance  $(U, \mathcal{F})$ . A minimum cover has size  $k^*$  if and only if  $k^*$  is the smallest integer such that  $\Pr(Y_{k^*} \mid \mathbf{u}(T_0, \mathbf{f})) \geq \gamma$ .

*Proof.* ( $\Rightarrow$ ) Let  $C$  be a minimum cover of the SET COVER instance  $(U, \mathcal{F})$ . By the premise, we have that  $|C| = k^*$ . We start by showing that  $\Pr(Y_{k^*} \mid \mathbf{u}(T_0, \mathbf{f})) \geq \gamma$  by constructing a distinguishing feature  $\Pi(C)$  of  $T_0$  where  $|\Pi| = k^*$ . Observe that for each subset  $S_j$  in  $C$  we have that  $\{\top, S_j\}$  is a featureette of  $T_0$ . We define  $\Pi(C)$  to be composed of featureettes  $\{\top, S_j\}$  for all subsets  $S_j \in C$ . Thus,  $|\Pi(C)| = k^*$ . To show that  $\Pi(C)$  is a distinguishing feature of  $T_0$ , it remains to show that at least one featureette  $\tau \in \Pi(C)$  is absent in each tree in  $\mathcal{T} \setminus T_0 = \{T_1, \dots, T_n\}$ . Consider any tree  $T_i \neq T_0$ . Since  $C$  is a cover, the element  $i$  of the universe  $U$  corresponding to tree  $T_i$  must be covered by some subset  $S_j \in C$ . This means that tree  $T_i$  contains the edge  $(\perp, S_j)$ , which means that the featureette  $\{\top, S_j\}$  in  $\Pi(C)$  is absent from  $T_i$ . Hence,  $\Pi(C)$  is a distinguishing feature of  $T_0$ .

We now must show that  $\Pr(Y_{k^*} \mid \mathbf{u}(T_0, \mathbf{f})) \geq \gamma$ . We do so by focusing on distinguishing feature  $\Pi(C)$ . By construction of  $T_0$  and  $\mathbf{f}$ , it follows from (1) that each featureette  $\{\top, S_j\}$  in  $\Pi(C)$  has a clonal prevalence  $u_j = \varepsilon$ . This means that a SCS experiment of  $k^*$  cells where we only observe the  $k^*$  featureettes/clones has a probability that is strictly greater than 0. Therefore,  $\Pr(Y_{k^*} \mid \mathbf{u}(T_0, \mathbf{f})) > 0$ . Since  $\varepsilon$  is a small positive infinitesimal constant, we have that  $\Pr(Y_{k^*} \mid \mathbf{u}(T_0, \mathbf{f})) \geq \gamma = \varepsilon$ .

It remains to show that  $k^*$  is the smallest integer where  $\Pr(Y_{k^*} \mid \mathbf{u}(T_0, \mathbf{f})) \geq \varepsilon$ . Assume for a contradiction that the smallest integer  $k'$  where  $\Pr(Y_{k'} \mid \mathbf{u}(T_0, \mathbf{f})) \geq \varepsilon$  is strictly smaller than  $k^*$ . This means that there exists a minimal distinguishing feature  $\Pi'$  of size at most  $k'$ . By definition  $\Pi'$  is composed of featureettes corresponding to root-to-vertex paths in  $T_0$ . Since  $\Pi'$  is minimal, it will not contain the featureette  $\{\top, \perp\}$  as this featureette is present in all remaining trees  $\{T_1, \dots, T_n\}$ . Thus,  $\Pi'$  is composed of featureettes of the form  $\{\top, S_j\}$  where  $S_j \in \mathcal{F}$ . Since  $\Pi'$  is a distinguishing feature, no tree  $T_i \in \{T_1, \dots, T_n\}$  contains all featureettes of  $\Pi'$ . By construction of  $\{T_1, \dots, T_n\}$ , this means that the subsets encoded in  $\Pi'$  form a cover of the universe  $U$ . Thus, there exists a cover with size strictly smaller than  $k^*$ , contradicting the premise. Therefore,  $k^*$  is indeed the smallest integer where  $\Pr(Y_{k^*} \mid \mathbf{u}(T_0, \mathbf{f})) \geq \gamma = \varepsilon$ .

( $\Leftarrow$ ) Let  $k^*$  be the smallest integer such that  $\Pr(Y_{k^*} \mid \mathbf{u}(T_0, \mathbf{f})) \geq \gamma = \varepsilon$ . We start by showing that the size of a minimum distinguishing feature  $\Pi$  of  $T_0$  has to be exactly  $k^*$ . Clearly, if  $|\Pi| > k^*$  then  $\Pr(Y_{k^*} \mid \mathbf{u}(T_0, \mathbf{f})) = 0$  as there exists no successful SCS experiment with  $k^*$  cells. On the other hand, if  $|\Pi| < k^*$  then there exists a successful SCS experiment with  $|\Pi|$  cells. In other words,  $\Pr(Y_{|\Pi|} \mid \mathbf{u}(T_0, \mathbf{f})) \geq \varepsilon$ . This contradicts that  $k^*$  is the smallest integer where  $\Pr(Y_{|\Pi|} \mid \mathbf{u}(T_0, \mathbf{f})) \geq \varepsilon$ . Hence,  $|\Pi| = k^*$ .

Consider a minimum distinguishing feature  $\Pi$  of  $T_0$ . By the previous argument, we know that  $|\Pi| = k^*$ . We will show that  $\Pi$  encodes a cover  $C(\Pi)$  of  $U$  of size  $k^*$ . Since  $\Pi$  is minimal, it will not contain the featureette  $\{\top, \perp\}$  of  $T_0$  as this featureette is present in all remaining trees  $\{T_1, \dots, T_n\}$ . Thus,  $\Pi$  is composed of  $k$  featureettes of the form  $\{\top, S_j\}$  where  $S_j \in \mathcal{F}$ . Let  $C(\Pi)$  be defined as the collection of subsets  $S_j \in \mathcal{F}$  where  $\{\top, S_j\}$  in  $\Pi$ . Since  $\Pi$  is a distinguishing feature, no tree  $T_i \in \{T_1, \dots, T_n\}$  contains all featureettes of  $\Pi$ . By construction of  $\{T_1, \dots, T_n\}$ , this means that  $C(\Pi)$  is a cover of size  $k$  of the universe  $U$ .

Finally, we must show that there exists no cover  $C'$  of  $U$  with size  $|C'|$  strictly smaller than  $k^*$ . Suppose for a contradiction that such a cover  $C'$  exists. By construction,  $C'$  encodes a distinguishing feature  $\Pi(C')$  composed of featureettes  $\{\top, S_j\}$  for all subsets  $S_j \in C'$ . Thus,  $|\Pi(C')| = |C'|$ . To show that  $\Pi(C')$  is a distinguishing feature of  $T_0$ , we must show that (i) all features  $\tau \in \Pi(C')$  are present in  $T_0$ , and (ii) at least one featureette  $\tau \in \Pi(C')$  is absent in each tree in  $\mathcal{T} \setminus T_0 = \{T_1, \dots, T_n\}$ . Condition (i) holds by construction of  $\Pi(C')$  and  $T_0$ , i.e. for each subset  $S_j$  in  $C'$  we have that  $\{\top, S_j\}$  is a featureette of  $T_0$ . As for condition (ii), consider any tree  $T_i \neq T_0$ . Since  $C'$  is a cover, the element  $i$  of the universe  $U$  corresponding to tree  $T_i$  must be covered by some subset  $S_j \in C'$ . This means that tree  $T_i$  contains the edge  $(\perp, S_j)$ , which means that the featureette  $\{\top, S_j\}$  in  $\Pi(C')$  is absent from  $T_i$ . Hence,  $\Pi(C')$  is a distinguishing feature of  $T_0$ . This in turn means that  $\Pr(Y_{|\Pi(C')|} \mid \mathbf{u}(T_0, \mathbf{f})) > 0$ . In other words,  $\Pr(Y_{|\Pi(C')|} \mid \mathbf{u}(T_0, \mathbf{f})) \geq \gamma = \varepsilon$ , thus contradicting the premise. Hence, minimum set covers of  $(U, \mathcal{F})$  have cardinality  $k^*$ .  $\square$

The theorem follows from the above lemma, as the reduction to obtain  $(\mathcal{T}, T_0, \mathbf{f}, \gamma = \varepsilon)$  from  $(U, \mathcal{F})$  takes only polynomial time.

## A.2 Supplementary Methods

### A.2.1 Finding the Minimal Distinguishing Feature Family $\Phi^*$

To perform the calculation in (4), it is necessary to first find the minimal distinguishing feature family  $\Phi^*$ . Using similar ideas as in our hardness proof (Section A.1), we consider the reverse reduction from the problem of finding a minimal distinguishing feature to that of finding a minimum size set cover (Problem 3).

We define the universe  $U = \{1, \dots, m\}$  to be the set  $\mathcal{T} \setminus \{T\} = \{T_1, \dots, T_m\}$  of trees excluding the tree  $T$  for which we want to solve the  $T$ -SCS-PC problem. We define the family  $\mathcal{F} = \{S_1, \dots, S_n\}$  of subsets to correspond to the  $n$  featurettes present in  $T$ . Specifically, the subset  $S_j$  corresponding to featurette  $\tau_j$  that is present in  $T$  is composed of elements  $i \in U$  corresponding to trees  $T_i$  where  $\tau_j$  is absent. The key idea is that  $S_j$  is indicating in which input trees featurette  $\tau_j$  of  $T$  is absent. We note that  $\mathcal{F}$  is a multi-set as distinct featurettes  $\tau_j$  and  $\tau_{j'}$  may be absent in the same set of trees, thus leading to  $S_j = S_{j'}$  (Fig. 3b). There is a bijection between set covers of  $(U, \mathcal{F})$  and distinguishing features of  $T$ . That is, each distinguishing feature  $\Pi = \{\tau_1, \dots, \tau_{|\Pi|}\}$  corresponds to the same-sized cover  $\Pi(C)$  composed of subsets  $\{S_1, \dots, S_{|\Pi(C)|}\}$ , and vice versa. In particular, a minimal distinguishing feature corresponds to a minimal set cover. Thus, we may use the following integer linear program (ILP) to find a minimum set cover  $C$  and thus a corresponding *minimum* distinguishing feature  $\Pi(C)$  — a minimal distinguishing feature of minimum size.

$$\min \sum_{j=1}^n x_j \quad \text{s.t.} \quad \sum_{j \in [n]: i \in S_j} x_j \geq 1, \quad \forall i \in [m]. \quad (5)$$

In order to find the *next* minimum distinguishing feature  $\Pi(C')$  that is not contained within  $\Pi(C)$ , we add the following constraint to the ILP.

$$\sum_{j \in C} x_j \leq |C| - 1, \quad \forall C \in \mathcal{C}^*, \quad (6)$$

where  $\mathcal{C}^* = \{C\}$ . By repeatedly adding identified minimum set covers to  $\mathcal{C}^*$  until the ILP becomes infeasible, we identify all minimal set covers  $\mathcal{C}^*$  and thus all minimal distinguishing features  $\Phi^*$ . Fig. 3b shows an example. We use IBM ILOG CPLEX v12.9 to solve the ILP<sup>1</sup>.

## A.3 Supplementary Results

Gawad *et al.* (2014) used an EM-based algorithm to cluster the sequenced cells into 2 to 7 clones for each patient. Based on the fact that false negatives occur more frequently than false positives, we designated an SNV as present if at least 30% of cells in the clone had the mutation. We then checked if the resulting binary, clone-by-SNV matrices adhered to the infinite sites assumption, which was the case for only patients 2 and 3. While the VAFs of all 16 SNVs in patient 2 are less than 0.5, patient 3 had 6 out of 49 SNVs with a VAF larger than 0.5, which is indicative of copy number aberrations. Since no copy number information was available to infer cancer cell fractions, we excluded patient 3 from our analysis, thus restricting our attention to patient 2.

Gawad *et al.* (2014) clustered the 115 cells of patient 2 into 5 clones. This patient has 16 SNVs, from which we excluded mutations *CMTM8*, *ATRNLI*, *LINC00052* and *TRRAP* for reasons that we described

<sup>1</sup><https://www.ibm.com/analytics/cplex-optimizer>



in the main text. The majority voting rule described above yielded a binary clone-by-SNV matrix with 4 mutations clusters that each correspond to SNVs that co-occur in every clone (Fig. S2a), corresponding to a two-state perfect phylogeny  $T_{\text{SCS}}$  on the mutation clusters (Fig. 5b). To obtain the set  $\mathcal{T}$  of candidate phylogenies, we considered the bulk data. Specifically, we merged mutations ZC3H3 and XPO7 as they had the same VAF in the bulk data and occurred in the same mutation cluster in the cleaned SCS data (Fig. 5a). Using SPRUCE (El-Kebir *et al.*, 2015), we enumerated  $|\mathcal{T}| = 2576$  trees (Fig. S2b). Only one tree  $T^* \in \mathcal{T}$  was consistent with  $T_{\text{SCS}}$ , i.e. each mutation cluster of  $T_{\text{SCS}}$  formed a connected path in  $T^*$  and subsequently collapsing these paths in  $T^*$  yields  $T_{\text{SCS}}$ . Comparing the cleaned single-cell data to the raw values, we computed a false negative rate  $\beta$  of 0.2 for the 14 mutations (Fig. S2a), which was in line with the value reported by Gawad *et al.* (2014).

**Table S6: Prospective analysis of TRACERx non-small-cell lung cancer cohort.** Table shows the patient identifier, the number of mutation clusters, the number of bulk samples, the minimum number of mutations per cluster, the maximum number of mutations per cluster, the size of the candidate set  $\mathcal{T}$  of trees as determined by Jamal-Hanjani *et al.* (2017), PhyDOSE's  $k^*$  calculated at confidence levels of  $\gamma \in \{0.75, 0.95\}$  and the recommended sample label from which the single cells should be drawn.

| patient  | clusters | samples | min muts | max muts | $ \mathcal{T} $ | $k^*(\gamma = 0.75)$ | $k^*(\gamma = 0.95)$ | sel. sample |
|----------|----------|---------|----------|----------|-----------------|----------------------|----------------------|-------------|
| CRUK0004 | 7        | 4       | 10       | 78       | 2               | 15                   | 32                   | R3          |
| CRUK0005 | 6        | 4       | 24       | 536      | 2               | 12                   | 26                   | R3          |
| CRUK0011 | 8        | 3       | 12       | 335      | 3               | 16                   | 34                   | R2          |
| CRUK0012 | 5        | 2       | 11       | 84       | 2               | 7                    | 15                   | R1          |
| CRUK0013 | 9        | 5       | 5        | 114      | 8               | 487                  | 1051                 | LN1         |
| CRUK0022 | 5        | 2       | 5        | 158      | 2               | 11                   | 23                   | R1          |
| CRUK0023 | 10       | 4       | 5        | 226      | 2               | 10                   | 20                   | R1          |
| CRUK0025 | 7        | 3       | 10       | 350      | 2               | 12                   | 25                   | R2          |
| CRUK0028 | 5        | 2       | 5        | 72       | 2               | 15                   | 33                   | R1          |
| CRUK0031 | 7        | 3       | 15       | 675      | 2               | 14                   | 30                   | R1          |
| CRUK0037 | 10       | 5       | 6        | 397      | 17              | $\infty$             | $\infty$             | N/A         |
| CRUK0038 | 4        | 2       | 6        | 107      | 2               | 20                   | 43                   | R1          |
| CRUK0046 | 5        | 4       | 5        | 186      | 2               | 14                   | 29                   | R1          |
| CRUK0049 | 6        | 2       | 7        | 882      | 4               | 17                   | 37                   | R2          |
| CRUK0063 | 8        | 5       | 5        | 167      | 2               | 16                   | 33                   | R4          |
| CRUK0067 | 5        | 2       | 24       | 263      | 2               | 14                   | 29                   | R1          |
| CRUK0068 | 10       | 4       | 11       | 532      | 3               | $\infty$             | $\infty$             | N/A         |
| CRUK0070 | 10       | 5       | 6        | 254      | 2               | 11                   | 24                   | R6          |
| CRUK0076 | 9        | 4       | 8        | 846      | 4               | 21971                | 47470                | R2          |
| CRUK0077 | 7        | 4       | 9        | 586      | 2               | 10                   | 22                   | R4          |
| CRUK0084 | 6        | 4       | 5        | 332      | 2               | 8                    | 17                   | R2          |
| CRUK0094 | 6        | 4       | 6        | 50       | 2               | 10                   | 22                   | R4          |
| CRUK0095 | 4        | 3       | 6        | 216      | 2               | 20                   | 42                   | R2          |
| CRUK0099 | 5        | 4       | 5        | 438      | 2               | 21                   | 46                   | R6          |
| CRUK0100 | 8        | 3       | 5        | 777      | 3               | 12                   | 24                   | R2          |

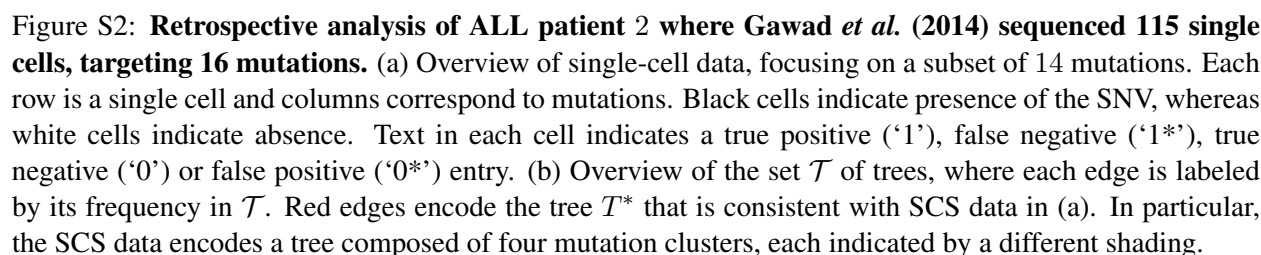

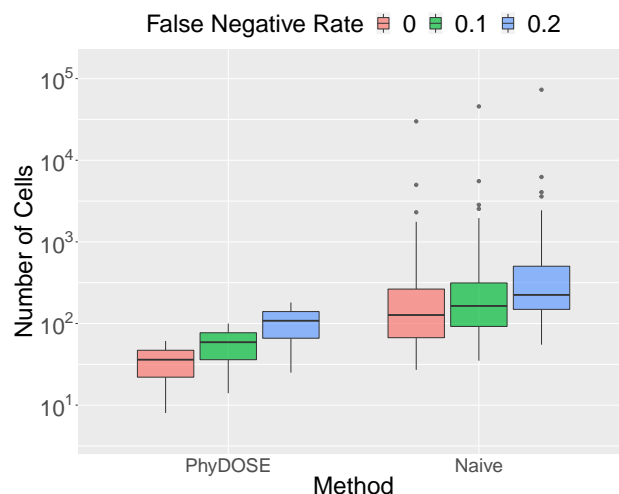

Figure S3: **Number of cells calculated by PhyDOSE versus the naive approach.** In the naive approach all featurettes/clones of the tree must be observed in at least one cell with confidence level  $\gamma = 0.95$ .

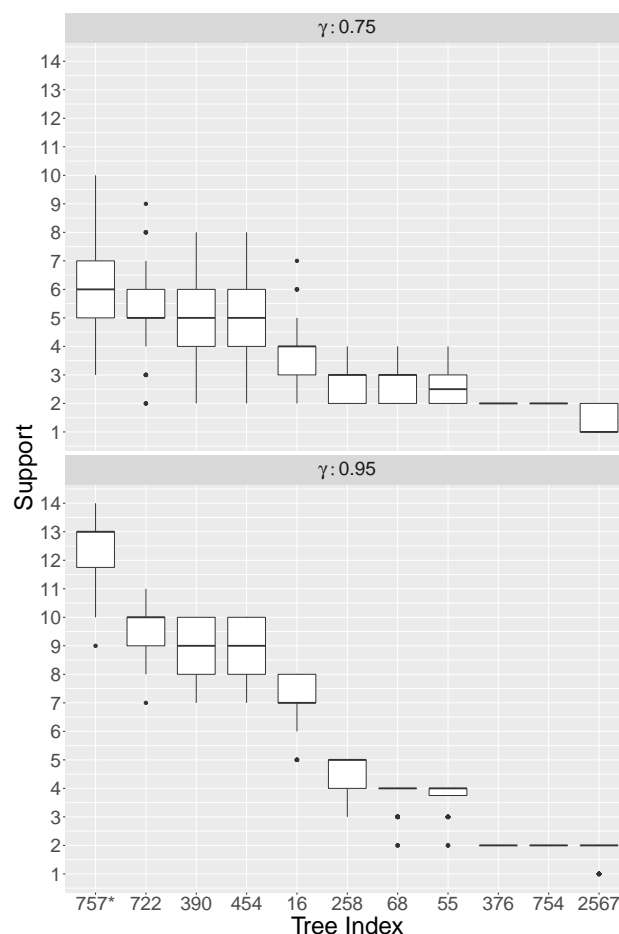

Figure S4: **Distribution of number of supporting cells for each candidate tree across 100 *in silico* SCS experiments at varying success probabilities for ALL patient 2 (Gawad *et al.*, 2014).** For  $\gamma = 0.75$ , we sampled  $k(T^*) = 50$  cells from the SCS data. For  $\gamma = 0.95$ , we sampled  $k(T^*) = 103$  cells. Fig. S5 shows the candidate trees.

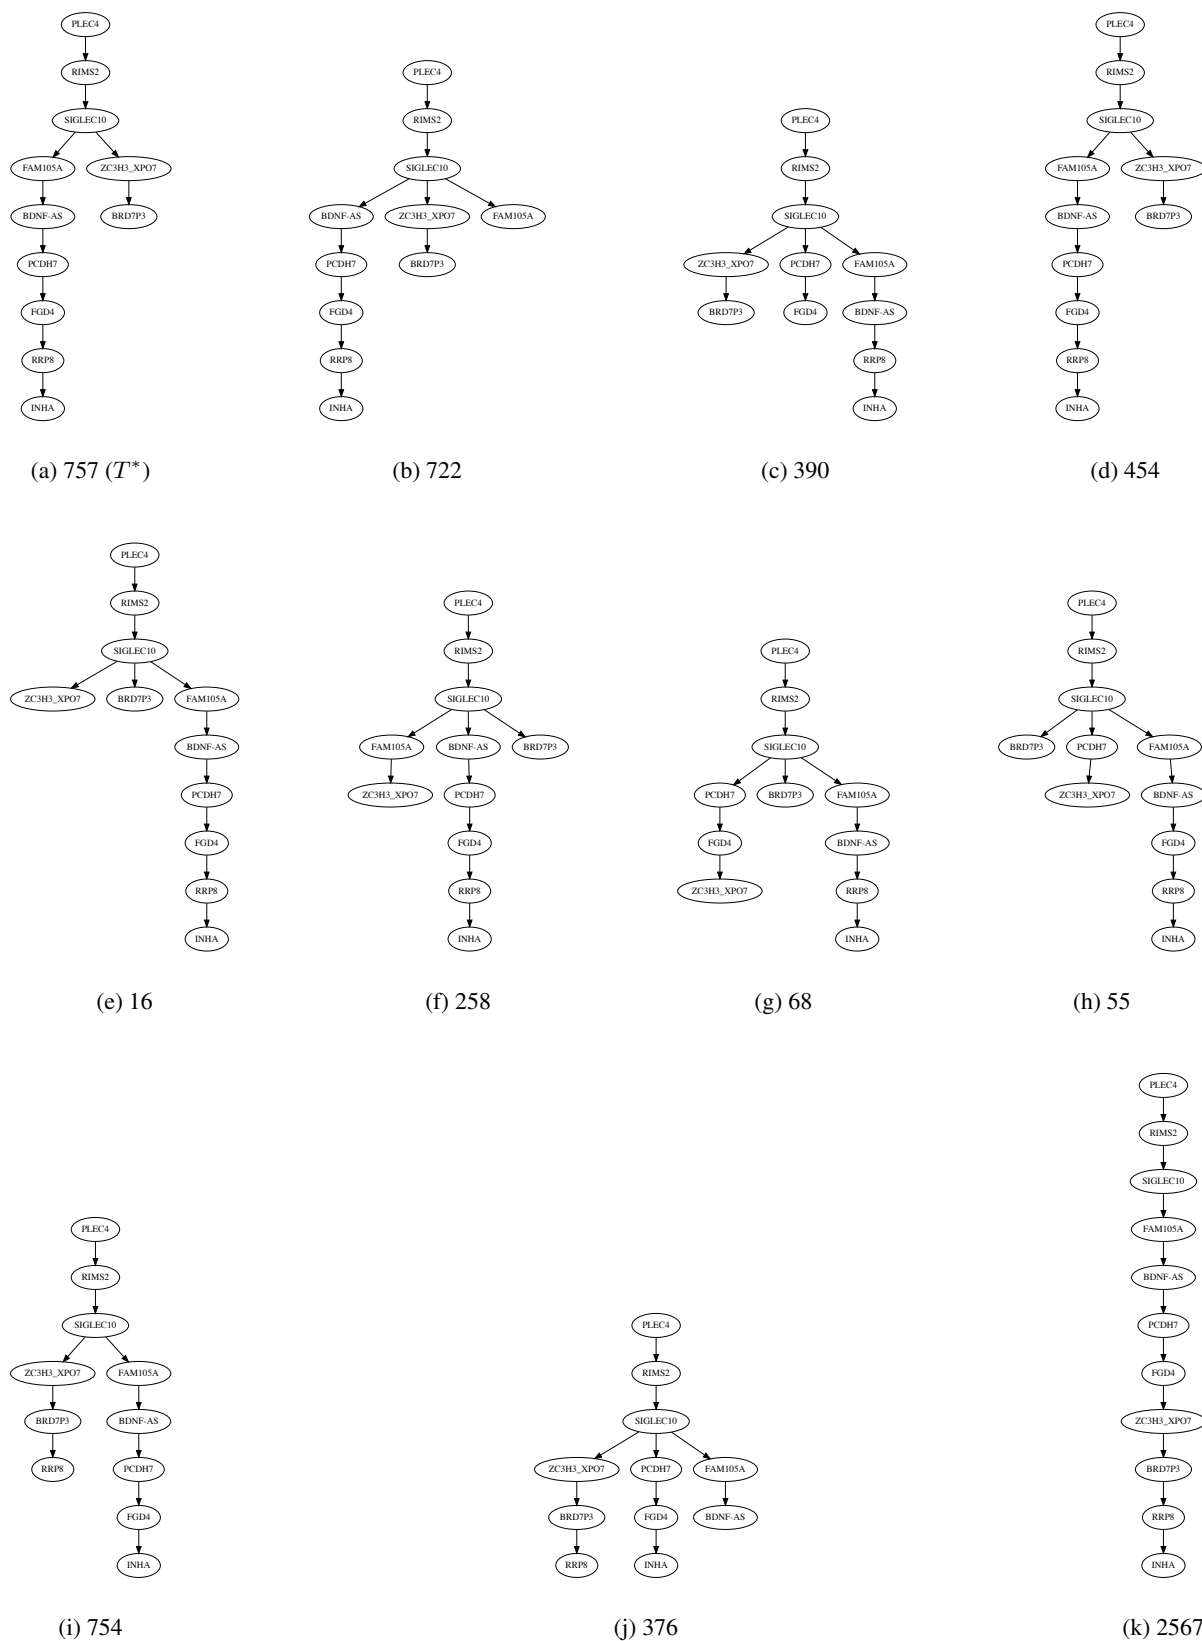

**Figure S5: Candidate trees that had a non-zero support across 100 *in silico* SCS experiments for ALL patient 2 (Gawad *et al.*, 2014).** For  $\gamma = 0.75$ , we sampled  $k(T^*) = 50$  cells from the SCS data. For  $\gamma = 0.95$ , we sampled  $k(T^*) = 103$  cells. Labels match tree indices in Fig. S4.



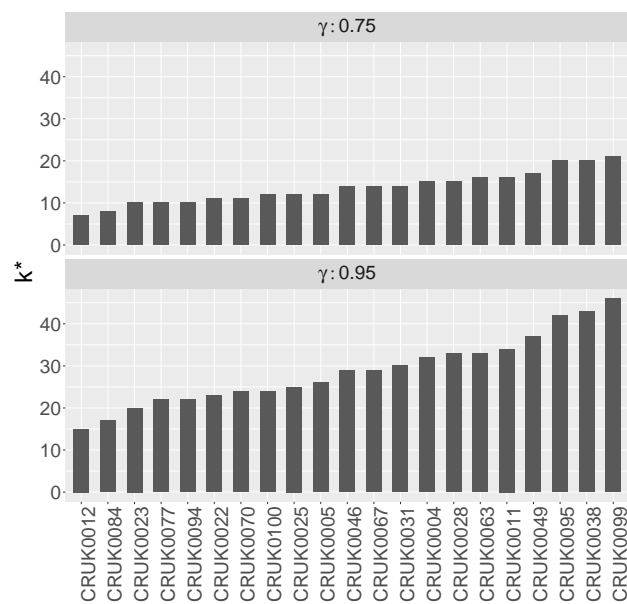

Figure S6: **PhyDOSE** calculated  $k^*$  for the lung cancer cohort at varying confidence levels. Patients CRUK0013, CRUK0037, CRUK0068, CRUK0076 were excluded from the plot, but are shown in Table S6.
